# Supplementary material
Source: Springer Nature journal article supplement (https://www.springermedizin.de/resource/supplementary/13054_2011_9633_MOESM4_ESM.pdf/9706660)

Does your institution or group have a written protocol, care guide, or statement concerning hemodynamic management in this setting?

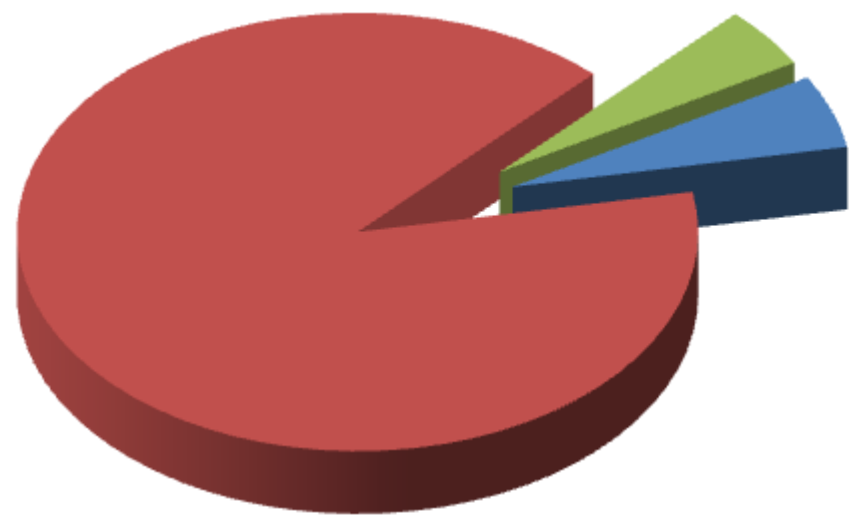

ASA Respondents

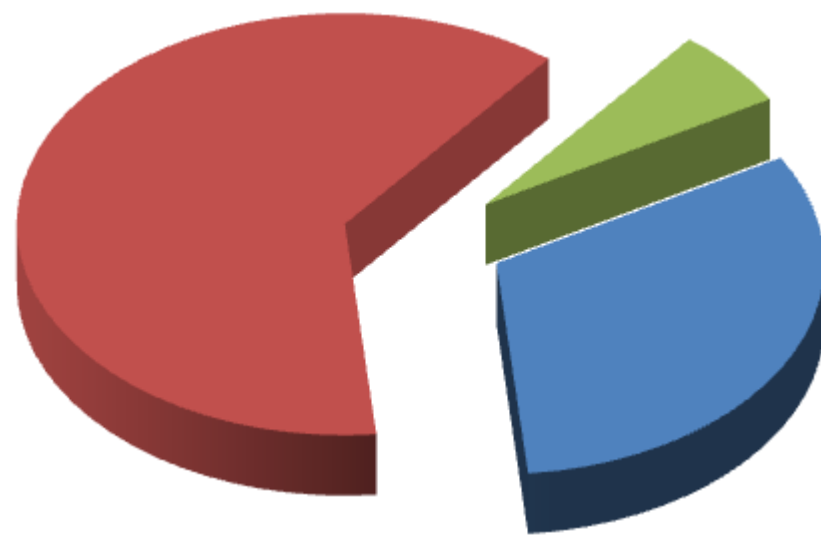

ESA Respondents

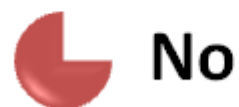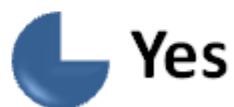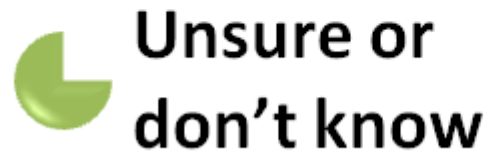

Supplement: MOESM4 [file 9706660]
